# Supplementary material
Source: publisher site journal article supplement (https://www.dovepress.com/get_supplementary_file.php?f=435921.docx)
Supplement: Supplementary file 1 [file get_supplementary_file.php]

**Predictive role of white blood cell differential count for the development of acute exacerbation in Korean chronic obstructive pulmonary disease**

Eun Chong Yoon1, So-My Koo1, Hye Yun Park2, Ho Cheol Kim3, Woo Jin Kim4, Ki Uk Kim5, Ki-Suck Jung6, Kwang Ha Yoo7, Hyoung Kyu Yoon8, Hee-Young Yoon1*

1Division of Allergy and Respiratory Diseases, Department of Internal Medicine, Soonchunhyang University Seoul Hospital, Seoul, Republic of Korea

2Department of Medicine, Samsung Medical Center, Sungkyunkwan University School of Medicine, Seoul, Republic of Korea

3Department of Internal Medicine, Gyeongsang National University Changwon Hospital, Gyeongsang National University School of Medicine, Changwon, Republic of Korea

4Department of Internal Medicine and Environmental Health Center, Kangwon National University, Chuncheon, Republic of Korea

5Department of Internal Medicine, Pusan National University Hospital, Busan, Republic of Korea

6Department of Internal Medicine, Hallym University Sacred Heart Hospital, Hallym University College of Medicine, Anyang, Republic of Korea

7Department of Internal Medicine, Konkuk University School of Medicine, Seoul, Republic of Korea

8Department of Internal Medicine, Yeouido St. Mary's Hospital, College of Medicine, The Catholic University of Korea, Seoul, Republic of Korea

**Supplementary Table 1 Univariate and Multivariable Logistic Analysis for Risk Factors of 3-year Cumulative AECOPD among Baseline WBC**

| **Variables** | **Unadjusted** | | | ***Adjusted** | | |
| --- | --- | --- | --- | --- | --- | --- |
| **OR** | **95% CI** | **P-value** | **OR** | **95% CI** | **P-value** |
| WBC | 2.846 | 1.739-4.659 | <0.001 | 2.366 | 1.211-4.623 | 0.012 |
| Median | 1.142 | 1.056-1.896 | 0.020 | 1.185 | 0.804-1.746 | 0.392 |
| Neutrophil | 1.812 | 1.320-2.488 | <0.001 | 1.454 | 0.963-2.195 | 0.075 |
| Median | 1.915 | 1.423-2.577 | <0.001 | 1.703 | 1.153-2.517 | 0.008 |
| Lymphocyte | 0.793 | 0.560-1.121 | 0.189 | 0.887 | 0.540-1.456 | 0.635 |
| Median | 0.876 | 0.654-1.172 | 0.373 | 0.831 | 0.563-1.226 | 0.350 |
| Monocyte | 1.332 | 0.928-1.911 | 0.120 | 1.279 | 0.767-2.133 | 0.346 |
| Median | 1.257 | 0.938-1.683 | 0.125 | 1.135 | 0.774-1.664 | 0.517 |
| Platelet | 0.949 | 0.599-1.503 | 0.824 | 0.876 | 0.490-1.565 | 0.654 |
| Median | 1.117 | 0.834-1.496 | 0.459 | 0.976 | 0.66-1.431 | 0.902 |
| NLR | 1.534 | 1.207-.950 | <0.001 | 1.323 | 0.957-1.828 | 0.090 |
| median | 1.525 | 1.137-2.045 | 0.005 | 1.429 | 0.966-2.111 | 0.074 |
| PLR | 1.173 | 0.868-1.585 | 0.298 | 1.012 | 0.679-1.508 | 0.953 |
| median | 1.177 | 0.879-1.575 | 0.275 | 0.967 | 0.656-1.427 | 0.867 |
| dNLR | 1.400 | 1.100-1.782 | 0.006 | 1.200 | 0.870-1.655 | 0.265 |
| median | 1.416 | 1.056-1.897 | 0.020 | 1.276 | 0.869-1.874 | 0.214 |
| MLR | 1.482 | 1.083-2.027 | 0.014 | 1.326 | 0.846-2.078 | 0.219 |
| median | 1.334 | 0.996-1.787 | 0.054 | 1.133 | 0.768-1.672 | 0.529 |
| EBR | 1.122 | 0.958-1.315 | 0.154 | 1.016 | 0.826-1.251 | 0.878 |
| median | 1.279 | 0.955-1.714 | 0.099 | 1.080 | 0.740-1.577 | 0.690 |

**Notes: ***Adjusted OR was calculated after adjusting the age, sex, smoking status, BMI, previous AECOPD history, FEV1, FVC, CAT total score, use of a long-acting muscarinic antagonist, inhaled corticosteroid/bronchodilator combination. WBC differential count and derived parameters were log-transformed before analysis and used as both continuous variables and categorical variables based on values above the median.

**Abbreviations:** AECOPD, acute exacerbation of chronic obstructive pulmonary disease; WBC, white blood cell; OR, odd ratio; CI, confidence interval; NLR, neutrophil/lymphocyte ratio; dNLR, derived neutrophil/lymphocyte ratio; PLR, platelet/lymphocyte ratio; MLR, monocyte/lymphocyte ratio; EBR, eosinophil/basophil ratio; BMI, body mass index; FEV1, forced expiratory volume in 1 s; FVC, forced vital capacity; CAT, COPD Assessment Test

**Supplementary Table 2 Univariate and Multivariable Logistic Analysis for Risk Factors of 3-year Cumulative AECOPD in WBC Changes**

| **Variables** | **Unadjusted** | | | ***Adjusted** | | |
| --- | --- | --- | --- | --- | --- | --- |
| **OR** | **95% CI** | **P-value** | **OR** | **95% CI** | **P-value** |
| 1-year (n=385) | | | | | | |
| WBC | 1.209 | 0.768-1.903 | 0.413 | 1.061 | 0.585-1.925 | 0.845 |
| Neutrophil | 0.972 | 0.618-1.531 | 0.903 | 0.959 | 0.524-1.757 | 0.892 |
| Lymphocyte | 1.380 | 0.874-2.180 | 0.167 | 1.309 | 0.713-2.404 | 0.386 |
| Monocyte | 0.807 | 0.512-1.271 | 0.355 | 0.601 | 0.327-1.108 | 0.103 |
| Eosinophil | 0.765 | 0.485-1.206 | 0.765 | 0.888 | 0.487-1.616 | 0.697 |
| Basophil | 0.911 | 0.579-1.436 | 0.689 | 0.912 | 0.498-1.669 | 0.765 |
| Platelet | 0.598 | 0.377-0.948 | 0.029 | 0.484 | 0.262-0.896 | 0.021 |
| NLR | 1.055 | 0.670-1.660 | 0.817 | 1.203 | 0.660-2.190 | 0.546 |
| NMR | NC |  |  |  |  |  |
| PLR | NC |  |  |  |  |  |
| dNLR | 1.115 | 0.708-1.755 | 0.638 | 1.331 | 0.730-2.427 | 0.351 |
| MLR | 0.715 | 0.453-1.128 | 0.149 | 0.525 | 0.282-0.978 | 0.042 |
| EBR | 0.763 | 0.484-1.201 | 0.243 | 0.746 | 0.403-1.381 | 0.351 |
| 2-year (n=294) | | | | | | |
| WBC | 0.739 | 0.432-1.264 | 0.269 | 0.772 | 0.381-1.567 | 0.484 |
| Neutrophil | 0.995 | 0.587-1.688 | 0.968 | 1.054 | 0.533-2.085 | 0.879 |
| Lymphocyte | 1.482 | 0.873-2.515 | 0.146 | 0.910 | 0.455-1.823 | 0.791 |
| Monocyte | 0.538 | 0.314-0.920 | 0.024 | 0.579 | 0.285-1.175 | 0.130 |
| Eosinophil | 0.913 | 0.539-1.548 | 0.735 | 1.053 | 0.522-2.124 | 0.885 |
| Basophil | 0.878 | 0.517-1.490 | 0.628 | 0.895 | 0.447-1.791 | 0.753 |
| Platelet | 0.631 | 0.369-1.078 | 0.092 | 0.605 | 0.300-1.220 | 0.160 |
| NLR | 0.750 | 0.442-1.273 | 0.287 | 0.645 | 0.320-1.299 | 0.219 |
| NMR | NC |  |  | NC |  |  |
| PLR | NC |  |  | NC |  |  |
| dNLR | 0.820 | 0.483-1.390 | 0.461 | 0.762 | 0.381-1.524 | 0.443 |
| MLR | 0.559 | 0.328-0.955 | 0.033 | 0.520 | 0.250-1.084 | 0.081 |
| EBR | 0.624 | 0.366-1.063 | 0.083 | 0.641 | 0.311-1.295 | 0.215 |
| 3-year (n=231) | | | | | | |
| WBC | 1.288 | 0.686-2.40 | 0.431 | 1.577 | 0.689-3.608 | 0.281 |
| Neutrophil | 1.078 | 0.580-2.003 | 0.813 | 1.333 | 0.592-3.000 | 0.488 |
| Lymphocyte | 1.617 | 0.873-2.994 | 0.126 | 0.890 | 0.408-1.941 | 0.769 |
| Monocyte | 0.854 | 0.454-1.607 | 0.624 | 0.818 | 0.354-1.891 | 0.639 |
| Eosinophil | 1.576 | 0.834-2.975 | 0.161 | 1.347 | 0.587-3.090 | 0.483 |
| Basophil | 1.075 | 0.584-1.979 | 0.816 | 0.795 | 0.363-.1740 | 0.565 |
| Platelet | 0.612 | 0.333-1.126 | 0.115 | 0.646 | 0.292-1.429 | 0.281 |
| NLR | 0.397 | 0.213-0.739 | 0.004 | 0.670 | 0.300-1.512 | 0.338 |
| NMR | 1.418 | 0.734-2.738 | 0.299 | 1.293 | 0.538-3.108 | 0.566 |
| PLR | NC |  |  | NC |  |  |
| dNLR | 0.443 | 0.237-0.829 | 0.011 | 0.764 | 0.339-1.721 | 0.515 |
| MLR | 0.790 | .0407-1.536 | 0.488 | 0.904 | 0.366-2.231 | 0.826 |
| EBR | 1.877 | 0.938-3.755 | 0.075 | 2.141 | 0.816-5.622 | 0.122 |

**Notes: ***Adjusted OR was calculated after adjusting the age, sex, smoking status, BMI, previous AE history, FEV1, FVC, CAT total score, use of a long-acting muscarinic antagonist, inhaled corticosteroid/bronchodilator combination. WBC differential count and derived parameters were log-transformed before analysis and used as both continuous variables and categorical variables based on values above the median.

**Abbreviations:** AECOPD, acute exacerbation of chronic obstructive pulmonary disease; WBC, white blood cell; OR, odd ratio; CI, confidence interval; NLR, neutrophil/lymphocyte ratio; dNLR, derived neutrophil/lymphocyte ratio; NMR, neutrophil/monocyte ratio; PLR, platelet/lymphocyte ratio; MLR, monocyte/lymphocyte ratio; EBR, eosinophil/basophil ratio; NC, not calculated.
